# Supplementary material for: Head-to-tail polymeric columnar structure of calix[4]arene possessing catechol arms in the solid state
Source: Royal Society of Chemistry journal article supplement (doi:10.1039/c3ce41660g), 2013-01-01
Supplement: c3ce41660g.pdf [file c3ce41660g.pdf]

## **Electronic Supplementary Information**

# **Head-to-tail polymeric columnar structure of calix[4]arene possessing catechol arms in the solid state**

Ryo Sekiya, Yutaro Yamasaki, Susumu Katayama, Hidemi Shio, and Takeharu Haino\*

Department of Chemistry, Graduate School of Science, Hiroshima University, 1-3-1 Kagamiyama,  
Higashi-Hiroshima, Hiroshima 739-8526, Japan.

\*To whom correspondence should be addressed.

[haino@hiroshima-u.ac.jp](mailto:haino@hiroshima-u.ac.jp)

# Contents

## Supporting Figures and Table

- **Figure S1** ORTEP drawings of the front and top views of **1** ... S2
- **Table S1** Selected structural parameters of the calix[4]arenes ... S3
- **Figure S2** Space filling illustrations of the columnar structures of **1** ... S3

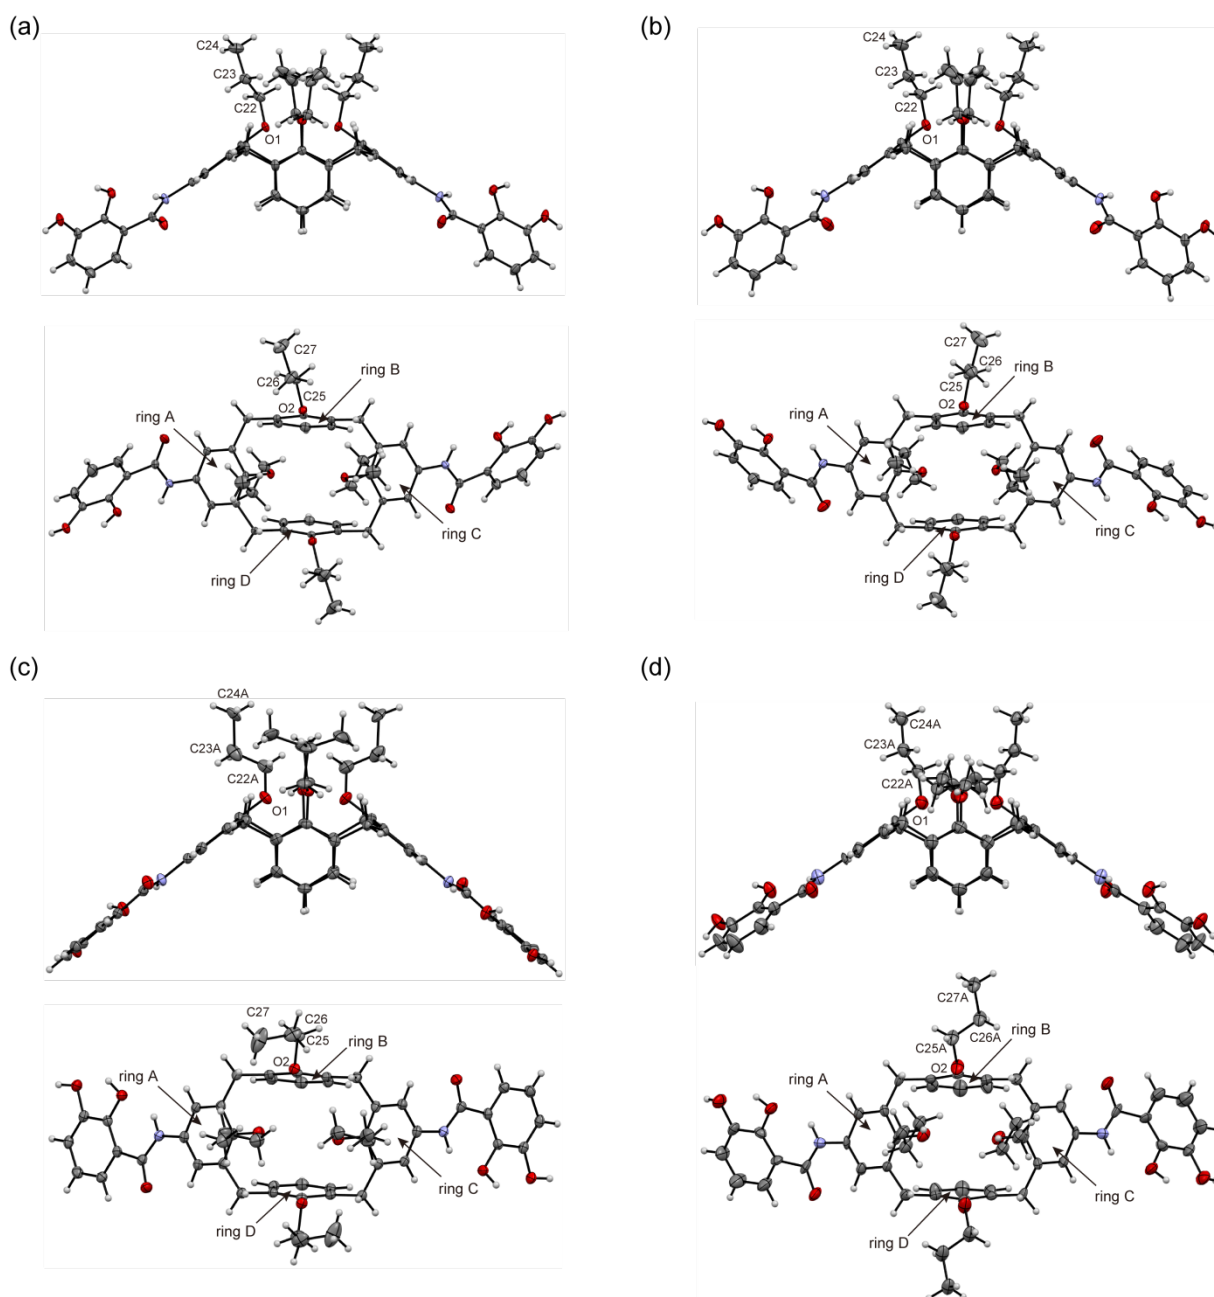

**Figure S1.** ORTEP drawings of the front and top views of **1** in (a) **1**•(MeOH)<sub>4</sub>, (b) **1**•(EtOH)<sub>4</sub>, (c) **1**•(*i*-PrOH)<sub>4</sub> and (d) **1**•(BDO)<sub>2</sub> (50% probability ellipsoids). Colour scheme: grey (carbon), white (hydrogen), light blue (nitrogen), red (oxygen). BDO = 1,4-butanediol.

**Table S1.** Selected structural parameters of the calix[4]arenes found in **1**•(MeOH)<sub>4</sub>, **1**•(EtOH)<sub>4</sub>, **1**•(*i*-PrOH)<sub>4</sub> and **1**•(BDO)<sub>2</sub>.

| Crystal                                  | Inter-annular aromatic angle between rings A and C /° | Inter-annular aromatic angle between rings B and D /° | Inter-centroid distance between rings A and C /Å | Inter-centroid distance between rings B and D /Å | O1-C22(A)-C23(A)-C24(A) torsion angle /° | O2-C25(A)-C26(A)-C27(A) torsion angle /° |
|------------------------------------------|-------------------------------------------------------|-------------------------------------------------------|--------------------------------------------------|--------------------------------------------------|------------------------------------------|------------------------------------------|
| <b>1</b> •(MeOH) <sub>4</sub>            | 72.90                                                 | 23.14                                                 | 7.716                                            | 4.750                                            | 173.47                                   | 175.52                                   |
| <b>1</b> •(EtOH) <sub>4</sub>            | 73.63                                                 | 23.95                                                 | 7.710                                            | 4.712                                            | 175.04                                   | 175.54                                   |
| <b>1</b> •( <i>i</i> -PrOH) <sub>4</sub> | 77.53                                                 | 19.51                                                 | 7.683                                            | 4.778                                            | 176.21                                   | 69.63                                    |
| <b>1</b> •(BDO) <sub>2</sub>             | 72.46                                                 | 21.36                                                 | 7.685                                            | 4.843                                            | 178.84                                   | 175.16                                   |

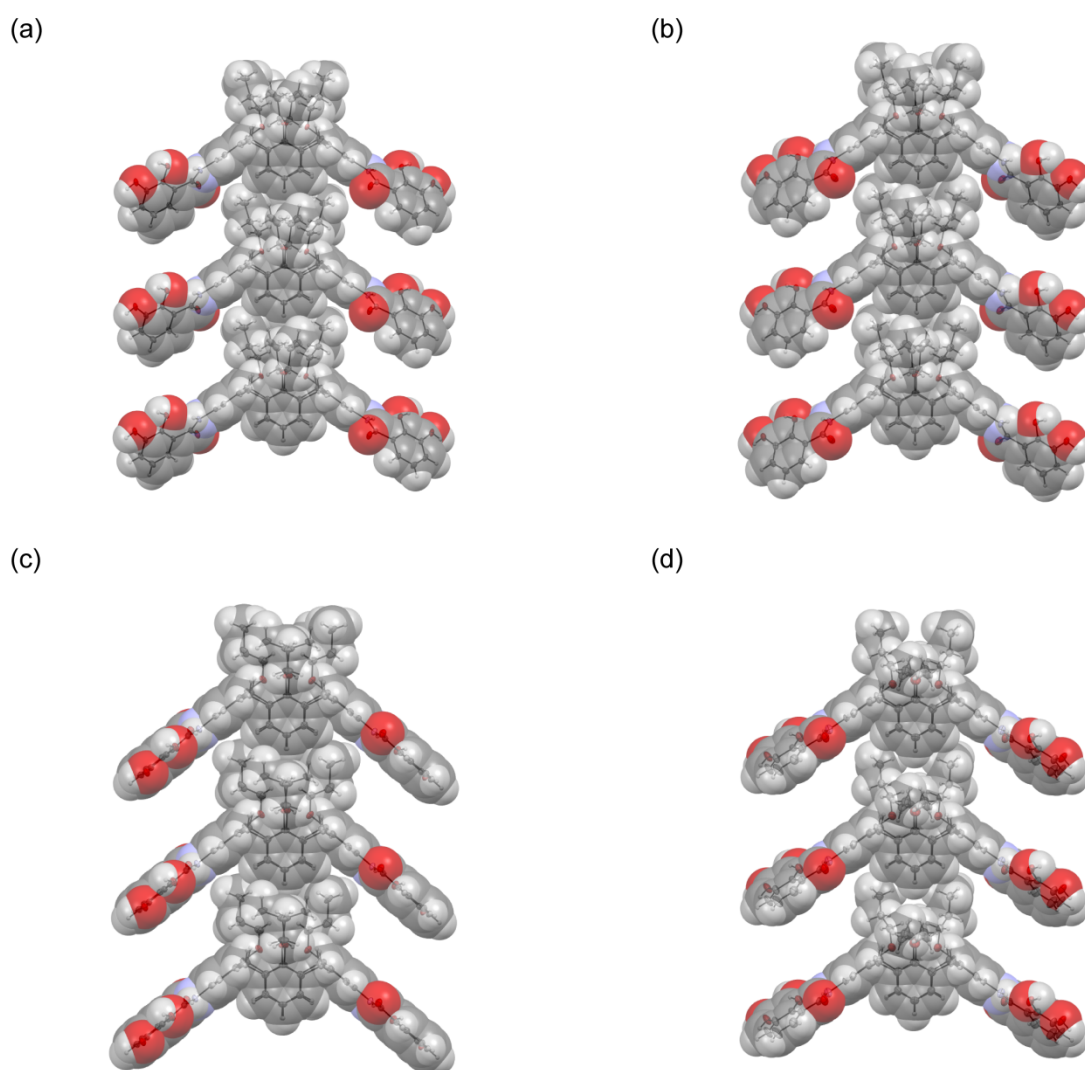

**Figure S2.** Space-filling illustrations of the head-to-tail polymeric columnar structures of **1** found in (a) **1**•(MeOH)<sub>4</sub>, (b) **1**•(EtOH)<sub>4</sub>, (c) **1**•(*i*-PrOH)<sub>4</sub> and (d) **1**•(BDO)<sub>2</sub>. Colour scheme: grey (carbon), white (hydrogen), light blue (nitrogen), red (oxygen).
